# Supplementary material for: 粒状体シミュレ-ションによる岩屑流・土石流の解析
Source: Royal Society of Chemistry journal article supplement (doi:10.1039/d1nr03830c), 1990-06-01
Supplement: d1nr03830c1.pdf [file d1nr03830c1.pdf]

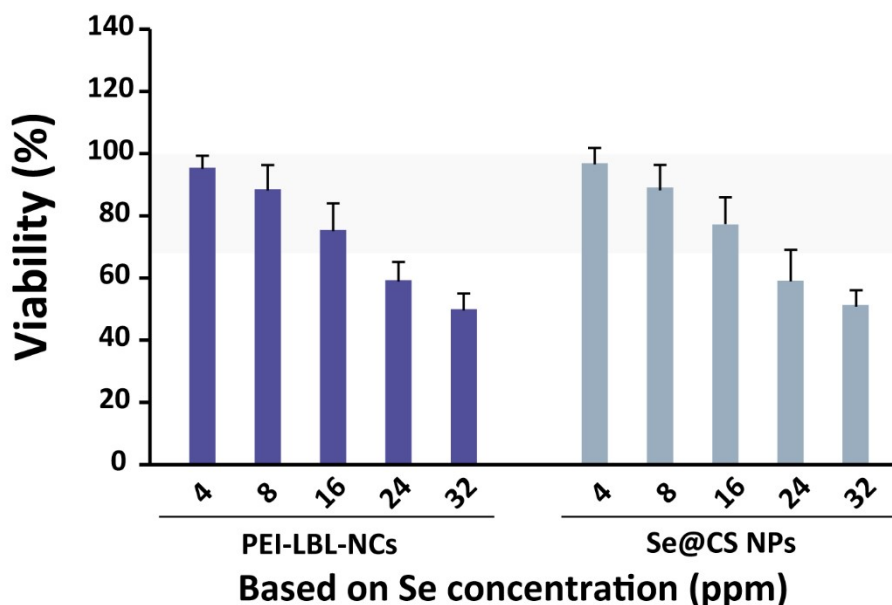

**Figure S1.** Cell viability of PEI-LBL-NCs and Se@CS NPs in RAW 264.7 cells. Cell viability, measured by the metabolic CellTiter Glo assay, after 4h incubation with PEI-LBL-NCs and Se@CS NPs as a function of Se concentration (ppm).

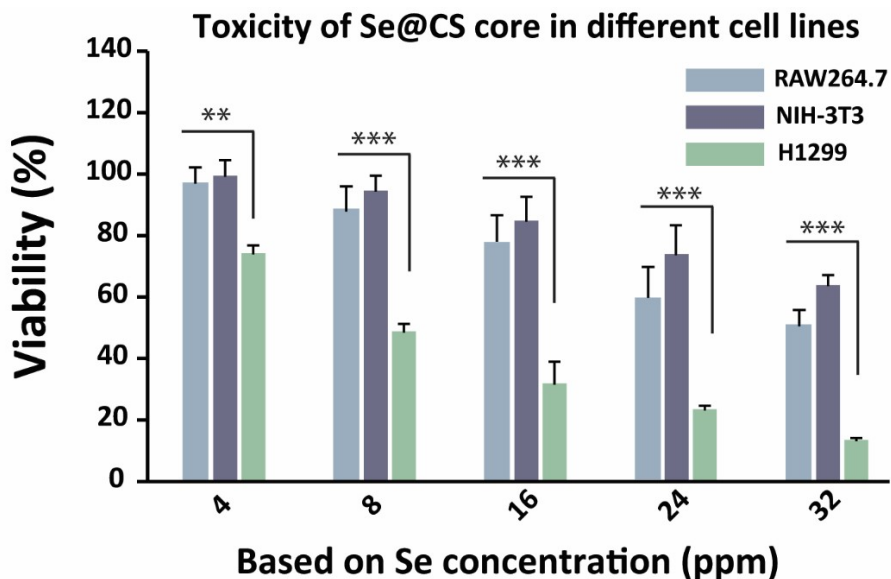

**Figure S2.** Cell viability of Se@CS core in RAW 264.7, NIH-3T3, and H1299 cells. Cell viability, measured by the metabolic CellTiter Glo assay, after 4h incubation with Se@CS as a function of Se concentration (ppm). Bars represent mean  $\pm$  standard deviation, ( ns = not significant, n = 3, \*:  $p < 0.05$ ; \*\*:  $p < 0.01$ ; \*\*\*:  $p < 0.001$ ).

**A**

— BG — Naked siRNA — PEI-LBL-NCs — CS-LBL-NCs — jetPRIME-NCs — RNAiMAX-NCs

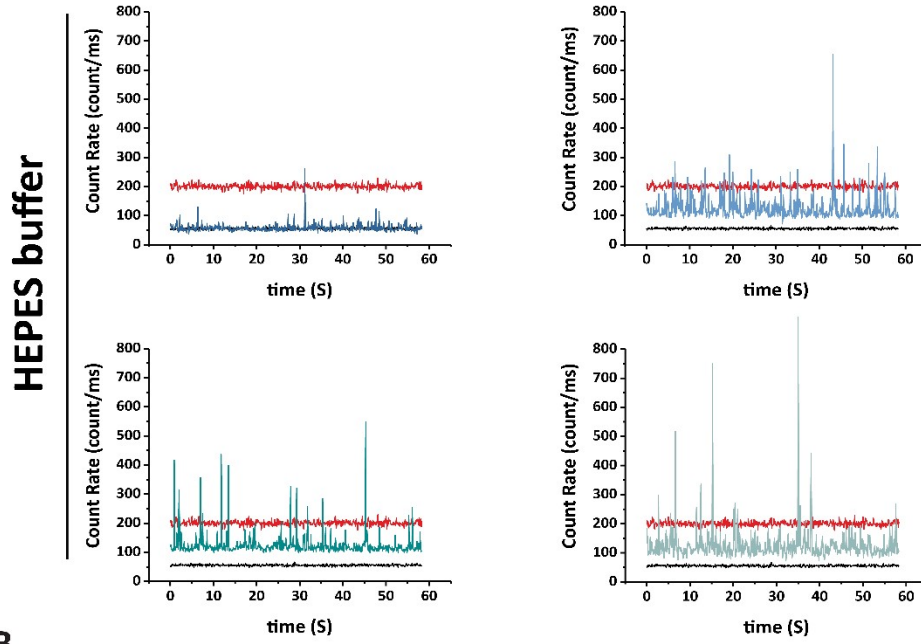**B**

— BG — Naked siRNA — PEI-LBL-NCs — CS-LBL-NCs — jetPRIME-NCs — RNAiMAX-NCs

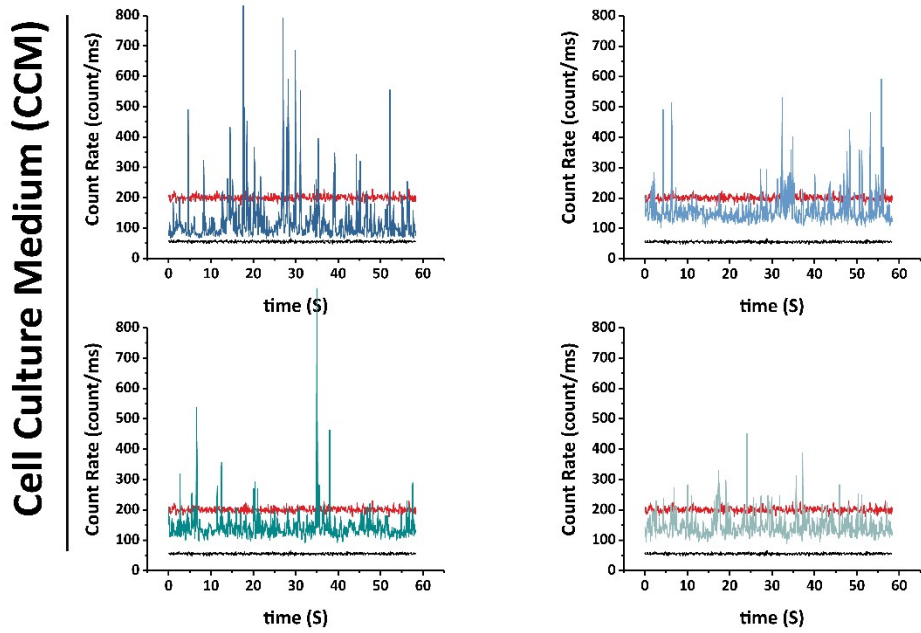

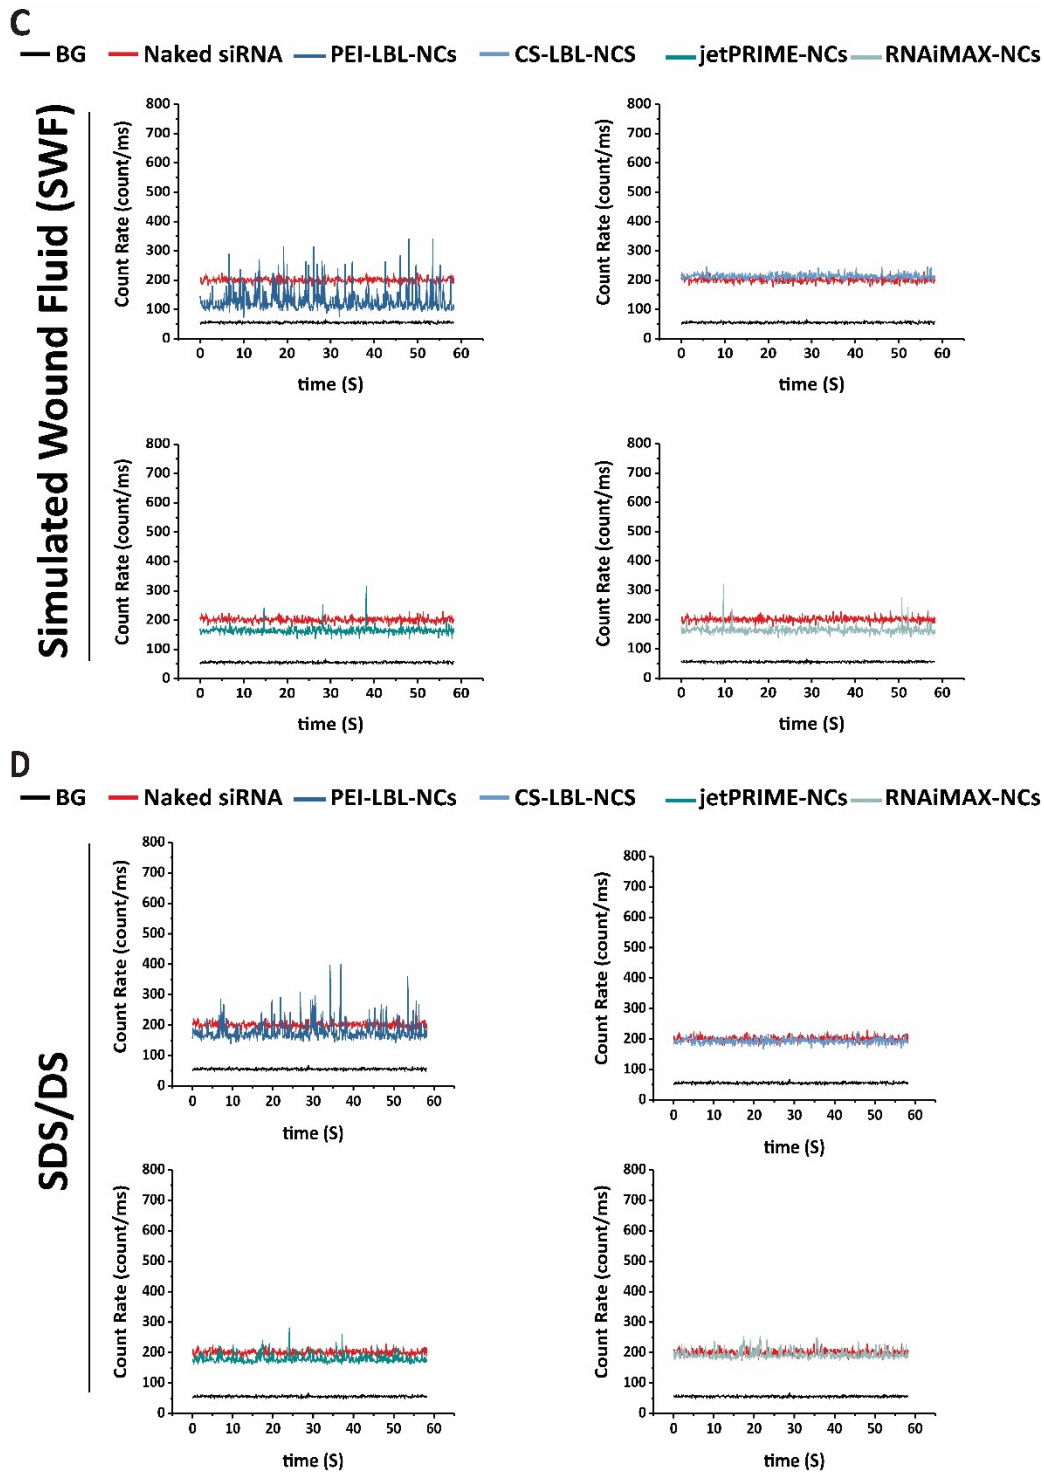

**Figure S3. FFS decomplexation assay.** Representative fluorescence fluctuations as measured with FFS for naked siRNA (red) Water Background (BG, Black), NCs (PEI-LBL-NCs, CS-LBL-NCs, jetPRIME-NCs, and RNAiMAX-NCs) 4h incubated in **(A)** HEPES, **(B)** CCM, **(C)** SWF, and **(D)** NCs 15 min incubated in SDS/DS (PEI-LBL-NCs, CS-LBL-NCs, and jetPRIME-NCs were incubated in sodium dodecyl sulfate (SDS) 2%, and RNAiMAX-NCs incubated with dextran sulfate (DS) 0.1%).
